# Supplementary material
Source: MDPI journal article supplement (https://www.mdpi.com/1999-4907/14/4/719)
Supplement: s1 [file s1 › forests-2289173-supplementary.pdf]

Innes and Blackford Table S1. Full stratigraphic descriptions and interpretations of the four sediment profiles discussed in this paper: Sniggery Wood, Little Hawes Water ESE3, North Gill 7 and Bonfield Gill.

|           |                                                                                                                                                                                                             |
|-----------|-------------------------------------------------------------------------------------------------------------------------------------------------------------------------------------------------------------|
| Fig. 2    | Sniggery Wood                                                                                                                                                                                               |
| Stratum 6 | 0 – 10 cm<br>Medium-fine yellow sand                                                                                                                                                                        |
| Stratum 5 | 10 – 86 cm<br>Well humified compact brown peat with some <i>Eriophorum</i> (cotton-grass) remains. <i>Betula</i> (birch) wood at 40 and 64 cm.                                                              |
| Stratum 4 | 86 –150 cm<br>Well humified, compact black woody detrital peat with fragments of <i>Alnus</i> (alder) wood common and occasional <i>Phragmites</i> (reed) rhizomes and seeds of <i>Menyanthes</i> (bogbean) |
| Stratum 3 | 150–175 cm<br>Brown humified <i>Phragmites</i> peat.                                                                                                                                                        |
| Stratum 2 | 175–205 cm<br>Coarse grey sand, organic at the top of the stratum.                                                                                                                                          |
| Stratum 1 | 205–220 cm<br>Pink clay                                                                                                                                                                                     |

Stratum 1 comprises the local glacial clay (till), which was not penetrated further. Stratum 2 is fluvioglacial outwash sand and stratum 3 represents organic accumulation in a reedswamp environment, which developed into fen-carr in stratum 4. Stratum 5 reflects the progression to a more acidic mire with reduced water depths. The change to sand in stratum 6 occurred when the profile was covered by blown sand, as part of the development of dune environments on this coastal plain. The section sampled at fine resolution (150-160 cm) was well humified peat without wood remains.

|           |                                                                                            |
|-----------|--------------------------------------------------------------------------------------------|
| Fig. 3    | Little Hawes Water ESE3                                                                    |
| Stratum 5 | 0 – 50 cm<br>Partly oxidised humified brown peat with some wood fragments                  |
| Stratum 4 | 50 – 67 cm<br>Well humified amorphous black peat with occasional <i>Phragmites</i> remains |
| Stratum 3 | 67 – 68 cm<br>Black amorphous peat with some fine charcoal particles                       |
| Stratum 2 | 68 – 77 cm<br>Dark brown well humified peat with occasional wood remains                   |
| Stratum 1 | 77 –150 cm<br>Sandy stiff grey clay                                                        |

Stratum 1 is probably a solifluction deposit which is present throughout the lake basin. It was not penetrated further. The well numified peat of Stratum 2 was probably formed as limnic conditions changed into reedswamp environments as the basin began to accumulate organic sediments., continuing into stratum 3 during which small amounts of charcoal were included. The profile progressed into fen-reedswamp peat in stratum 4. This continues to the surface in stratum 5 although it has become somewhat oxidized because of drainage. The sequence is a lake-edge hydrosere succession through reedswamp and fen-carr environments.

|           |                                                    |
|-----------|----------------------------------------------------|
| Fig. 4    | North Gill 7                                       |
| Stratum 5 | 0 – 60 cm<br>Brown humified <i>Eriophorum</i> peat |
| Stratum 4 | 60 – 79 cm                                         |

|           |                                                                                                                      |
|-----------|----------------------------------------------------------------------------------------------------------------------|
| Stratum 3 | Well humified amorphous black peat<br>79 – 83 cm                                                                     |
| Stratum 2 | Well humified amorphous black peat with some fine charcoal particles<br>83 – 94 cm                                   |
| Stratum 1 | Light brown amorphous peat with a high mineral content which decreases towards the top of the stratum<br>94 – 100 cm |
|           | Coarse yellow sand                                                                                                   |

The yellow sand of Stratum 1 is a fossil mineral soil, with Stratum 2 being the transitional horizon during which peat formed over the sandy soil. The very well humified amorphous peat of Stratum 3 records slow organic accumulation during which some charcoal became incorporated in the peat. Slowly accumulating amorphous peat continued to form in Stratum 4, transitioning to a more acidic bog peat in Stratum 5.

|            |                                                                                                               |
|------------|---------------------------------------------------------------------------------------------------------------|
| Fig. 5     | Bonfield Gill Head                                                                                            |
| Stratum 11 | 0 – 20 cm<br>Well humified <i>Sphagnum</i> peat                                                               |
| Stratum 10 | 20 – 40 cm<br><i>Eriophorum</i> peat                                                                          |
| Stratum 9  | 40 – 52 cm<br>Humified <i>Eriophorum</i> peat with Ericaceae twigs. Base of <i>Betula</i> stump at 40-41 cm.  |
| Stratum 8  | 52 – 54 cm<br>Amorphous monocot peat with many wood fragments                                                 |
| Stratum 7  | 54 – 58 cm<br>Black amorphous peat with many small charcoal fragments                                         |
| Stratum 6  | 58 – 70 cm<br>Brown humified peat with <i>Eriophorum</i> remains.                                             |
| Stratum 5  | 70 – 77 cm<br>Black amorphous peat with small wood fragments                                                  |
| Stratum 4  | 77 – 81 cm<br>Black amorphous peat with many small charcoal fragments                                         |
| Stratum 3  | 81 – 90 cm<br>Amorphous and detrital peat with <i>Betula</i> wood pieces.                                     |
| Stratum 2  | 90 – 97 cm<br>Brown amorphous peat with a high mineral content which decreases towards the top of the stratum |
| Stratum 1  | 97 – 105 cm<br>Coarse yellow sand with small wood pieces                                                      |

The yellow sand of Stratum 1 is a fossil mineral soil, with Stratum 2 being the transitional horizon during which peat formed over the sandy soil. Stratum 3 records the establishment of fen environments with birch growing on site, with slow organic accumulation in Stratum 4 during which fire occurred nearby as charcoal is introduced to the mire. Stratum 5 is similar but with no charcoal input and the renewed growth of birch at the site. A more acidic bog peat occurs in Stratum 6, and the presence of charcoal in Stratum 7 indicates renewed fire nearby. Strat 8, 9 and 10 record the growth of acidic bog peat with nearby birch growth in Stratum 8. Strat 9, 10 and 11 record increasingly acidic and wetter bog environments with *Sphagnum* replacing *Eriophorum* at the top of the profile.
